# Supplementary material for: Spawning aggregations of checkered snapper (Lutjanus decussatus) and blackspot snapper (L. fulviflamma): seasonality, lunar-phase periodicity and spatial distribution within spawning ground
Source: PeerJ. 2023 Sep 11;11:e15991. doi: 10.7717/peerj.15991 (PMC10710171; doi:10.7717/peerj.15991)
Supplement: Supplemental Information 4 — Numbers (1 - 24) represent “time period” (see Table S1). Twenty-four time periods were set based on four lunar phases (last-quarter moon, new moon, first-quarter moon and full moon). Lunar phases are abbreviated as LQM, last-quarter moon; NewM, new moon; FQM, first-quarter moon; FullM, full moon. For example, “1-LQM” means the fish density data was collected at time period “1” and the lunar phase was at the time period was around last-quarter moon. Time lag = 0, 4, 8, 12: auto-correlation coefficients were calculated by using fish density data that were collected at the same lunar phases. Time lag = 1, 2, 3, 5, 6, 7, 9, 10, 11: auto-correlation coefficients were calculated by using fish density data that were collected at different lunar phases. [file peerj-11-15991-s004.xls]

## Sheet: Table S2
Table S2. Detail about "time lag", "time period" and lunar phase for a time-series analysis (correlogram). Numbers (1 - 24) represent "time period" (see Table S1). Twenty-four time periods were set based on four lunar phases
(last-quarter moon, new moon, first-quarter moon and full moon). Lunar phases are abbreviated as LQM: last-quarter moon; NewM: new moon; FQM: first-quarter moon; FullM: full moon.
For example, "1-LQM" means the fish density data was collected at time period "1" and the lunar phase was at the time period was around last-quarter moon.
Time lag = 0, 4, 8, 12: auto-correlation coefficients were calculated by using fish density data that were collected at the same lunar phases.
Time lag = 1, 2, 3, 5, 6, 7, 9, 10, 11: auto-correlation coefficients were calculated by using fish density data that were collected at different lunar phases.
Original data	Time lag = 0	Time lag = 1	Time lag = 2	Time lag = 3	Time lag = 4	Time lag = 5	Time lag = 6	Time lag = 7	Time lag = 8	Time lag = 9	Time lag = 10	Time lag = 11	Time lag = 12
1-LQM	1-LQM
2-NewM	2-NewM	1-LQM
3-FQM	3-FQM	2-NewM	1-LQM
4-FullM	4-FullM	3-FQM	2-NewM	1-LQM
5-LQM	5-LQM	4-FullM	3-FQM	2-NewM	1-LQM
6-NewM	6-NewM	5-LQM	4-FullM	3-FQM	2-NewM	1-LQM
7-FQM	7-FQM	6-NewM	5-LQM	4-FullM	3-FQM	2-NewM	1-LQM
8-FullM	8-FullM	7-FQM	6-NewM	5-LQM	4-FullM	3-FQM	2-NewM	1-LQM
9-FQM	9-FQM	8-FullM	7-FQM	6-NewM	5-LQM	4-FullM	3-FQM	2-NewM	1-LQM
10-NewM	10-NewM	9-FQM	8-FullM	7-FQM	6-NewM	5-LQM	4-FullM	3-FQM	2-NewM	1-LQM
11-FQM	11-FQM	10-NewM	9-FQM	8-FullM	7-FQM	6-NewM	5-LQM	4-FullM	3-FQM	2-NewM	1-LQM
12-FullM	12-FullM	11-FQM	10-NewM	9-FQM	8-FullM	7-FQM	6-NewM	5-LQM	4-FullM	3-FQM	2-NewM	1-LQM
13-FQM	13-FQM	12-FullM	11-FQM	10-NewM	9-FQM	8-FullM	7-FQM	6-NewM	5-LQM	4-FullM	3-FQM	2-NewM	1-LQM
14-NewM	14-NewM	13-FQM	12-FullM	11-FQM	10-NewM	9-FQM	8-FullM	7-FQM	6-NewM	5-LQM	4-FullM	3-FQM	2-NewM
15-FQM	15-FQM	14-NewM	13-FQM	12-FullM	11-FQM	10-NewM	9-FQM	8-FullM	7-FQM	6-NewM	5-LQM	4-FullM	3-FQM
16-FullM	16-FullM	15-FQM	14-NewM	13-FQM	12-FullM	11-FQM	10-NewM	9-FQM	8-FullM	7-FQM	6-NewM	5-LQM	4-FullM
17-LQM	17-LQM	16-FullM	15-FQM	14-NewM	13-FQM	12-FullM	11-FQM	10-NewM	9-FQM	8-FullM	7-FQM	6-NewM	5-LQM
18-NewM	18-NewM	17-LQM	16-FullM	15-FQM	14-NewM	13-FQM	12-FullM	11-FQM	10-NewM	9-FQM	8-FullM	7-FQM	6-NewM
19-FQM	19-FQM	18-NewM	17-LQM	16-FullM	15-FQM	14-NewM	13-FQM	12-FullM	11-FQM	10-NewM	9-FQM	8-FullM	7-FQM
20-FullM	20-FullM	19-FQM	18-NewM	17-LQM	16-FullM	15-FQM	14-NewM	13-FQM	12-FullM	11-FQM	10-NewM	9-FQM	8-FullM
21-LQM	21-LQM	20-FullM	19-FQM	18-NewM	17-LQM	16-FullM	15-FQM	14-NewM	13-FQM	12-FullM	11-FQM	10-NewM	9-FQM
22-NewM	22-NewM	21-LQM	20-FullM	19-FQM	18-NewM	17-LQM	16-FullM	15-FQM	14-NewM	13-FQM	12-FullM	11-FQM	10-NewM
23-FQM	23-FQM	22-NewM	21-LQM	20-FullM	19-FQM	18-NewM	17-LQM	16-FullM	15-FQM	14-NewM	13-FQM	12-FullM	11-FQM
24-FullM	24-FullM	23-FQM	22-NewM	21-LQM	20-FullM	19-FQM	18-NewM	17-LQM	16-FullM	15-FQM	14-NewM	13-FQM	12-FullM
		24-FullM	23-FQM	22-NewM	21-LQM	20-FullM	19-FQM	18-NewM	17-LQM	16-FullM	15-FQM	14-NewM	13-FQM
			24-FullM	23-FQM	22-NewM	21-LQM	20-FullM	19-FQM	18-NewM	17-LQM	16-FullM	15-FQM	14-NewM
				24-FullM	23-FQM	22-NewM	21-LQM	20-FullM	19-FQM	18-NewM	17-LQM	16-FullM	15-FQM
					24-FullM	23-FQM	22-NewM	21-LQM	20-FullM	19-FQM	18-NewM	17-LQM	16-FullM
						24-FullM	23-FQM	22-NewM	21-LQM	20-FullM	19-FQM	18-NewM	17-LQM
							24-FullM	23-FQM	22-NewM	21-LQM	20-FullM	19-FQM	18-NewM
								24-FullM	23-FQM	22-NewM	21-LQM	20-FullM	19-FQM
									24-FullM	23-FQM	22-NewM	21-LQM	20-FullM
										24-FullM	23-FQM	22-NewM	21-LQM
											24-FullM	23-FQM	22-NewM
												24-FullM	23-FQM
													24-FullM
