# Supplementary material for: Spawning aggregations of checkered snapper (Lutjanus decussatus) and blackspot snapper (L. fulviflamma): seasonality, lunar-phase periodicity and spatial distribution within spawning ground
Source: PeerJ. 2023 Sep 11;11:e15991. doi: 10.7717/peerj.15991 (PMC10710171; doi:10.7717/peerj.15991)
Supplement: Supplemental Information 5 — Ovary developmental stages are shown as abbreviations: PYS, primary yolk stage; TYS, tertiary yolk stage; MNS, migration nuclear stage; PMA, pre-maturation stage; MA, maturation stage. Lunar-phase are abbreviated as LQM, last-quarter moon; NewM, new moon. “+” and “-” mean after and before the lunar phase (e.g., “NewM+1” means 1 day after new moon). [file peerj-11-15991-s005.xls]

## Sheet: Table S3
Table S3. Size, gonadsomatic index (GSI) and ovary developmental stage in relation to sampling date for Lutjanus decussatus.
Ovary developmental stages are shown as abbreviations: PYS = primary yolk stage; TYS = tertiary yolk stage; MNS =migration nuclear stage;
PMA = pre-maturation stage; MA = maturation stage. Lunar-phase are abbreviated as LQM: last-quarter moon; NewM: new moon.
"+" and "-" mean after and before the lunar phase (e.g. "NewM+1" means 1 day after new moon).
Date	Lunar phase	Sample No.	Fork length	Whole body weight	Gonad weight	GSI	Ovary developmental	Hydrated stage
			(mm)	(g)	(g)		stage
2021-05-03	LQM-1	1	245.5	310	33.96	12.3026	MA	Yes
2021-05-03	LQM-1	2	233	264	22.8	9.45274	MN	Yes
2021-05-03	LQM-1	3	233	240	14.74	6.54355	MN	Yes
2021-05-03	LQM-1	4	217.5	206	12.32	6.36101	MN	Yes
2021-06-01	LQM-1	1	304	580	37.4	6.89274	MN	Yes
2021-06-01	LQM-1	2	265.5	358	28.18	8.54405	MN	Yes
2021-06-01	LQM-1	3	272	420	29.38	7.52138	PMA	Yes
2021-06-01	LQM-1	4	261	386	48.98	14.5333	PMA	Yes
2021-06-01	LQM-1	5	228	256	24.6	10.6309	PMA	Yes
2021-06-01	LQM-1	6	263.5	380	35.06	10.1641	PMA	Yes
2021-06-01	LQM-1	7	262.5	372	43.05	13.0871	MN	Yes
2021-06-01	LQM-1	8	268	404	43.4	12.0355	MN	Yes
2021-06-01	LQM-1	9	217	200	14.61	7.88068	MN	Yes
2021-06-10	NewM	1	264	374	16.77	4.69445	TYS	No
2021-06-10	NewM	2	242	294	26.53	9.91887	MN	Yes
2021-07-01	LQM-1	1	243.5	328	33.31	11.3034	TYS	No
2021-07-01	LQM-1	2	260	370	42.37	12.9323	TYS	No
2021-07-01	LQM-1	3	254	346	38.61	12.5606	MN	Yes
2021-07-01	LQM-1	4	260	350	36.56	11.6641	MN	Yes
2021-07-01	LQM-1	5	234	246	19.96	8.8303	MN	Yes
2021-07-01	LQM-1	6	228	244	24.41	11.1162	TYS	No
2021-07-01	LQM-1	7	243	320	38.43	13.6485	MA	Yes
2021-07-01	LQM-1	8	205.5	156	0.66	0.424874	PYS	No
2021-07-01	LQM-1	9	221	216	21.42	11.0083	MN	Yes
2021-07-01	LQM-1	10	213.5	212	22.34	11.779	TYS	No
2021-07-10	NewM	1	252	324	17.64	5.75793	MN	Yes
2021-07-10	NewM	2	225	212	11.03	5.48838	MN	Yes
2021-07-31	LQM	1	212	194	12.02	6.60512	MN	Yes
2021-07-31	LQM	2	266	348	31.1	9.81382	MN	Yes
2021-07-31	LQM	3	250	290	17.18	6.29719	MA	Yes
2021-07-31	LQM	4	219	204	9.16	4.70129	TYS	No
2021-07-31	LQM	5	205.5	180	6.42	3.69858	TYS	No
2021-07-31	LQM	6	212	210	18.38	9.5919	TYS	No
2021-08-09	NewM+1	1	275.5	392	22.22	6.00898	TYS	No
2021-08-09	NewM+1	2	228	236	14.27	6.43576	TYS	No
2021-08-09	NewM+1	3	262	338	34.73	11.4518	MN	Yes
2021-08-09	NewM+1	4	222	200	12.25	6.52463	TYS	No
2021-08-29	LQM-1	1	231	280	55.8	24.8885	MA	Yes
2021-08-29	LQM-1	2	261	386	57.32	17.4395	MA	Yes
2021-08-29	LQM-1	3	252	340	49.74	17.1364	MA	Yes
2021-08-29	LQM-1	4	261	398	73.66	22.7107	MA	Yes
2021-08-29	LQM-1	5	261	368	51.25	16.18	MA	Yes
2021-08-29	LQM-1	6	246	302	39.63	15.1046	MA	Yes
2021-08-29	LQM-1	7	236	268	39.65	17.3637	MA	Yes
2021-08-29	LQM-1	8	240.5	316	45.71	16.9115	MA	Yes
2021-08-29	LQM-1	9	256	340	44.93	15.2269	MA	Yes
2021-09-07	NewM	1	237	254	16.51	6.95187	TYS	No
2021-10-02	LQM+3	1	259.5	342	10.24	3.08657	TYS	No
2021-10-02	LQM+3	2	222	224	12.06	5.69029	TYS	No
