# Supplementary material for: Spawning aggregations of checkered snapper (Lutjanus decussatus) and blackspot snapper (L. fulviflamma): seasonality, lunar-phase periodicity and spatial distribution within spawning ground
Source: PeerJ. 2023 Sep 11;11:e15991. doi: 10.7717/peerj.15991 (PMC10710171; doi:10.7717/peerj.15991)
Supplement: Supplemental Information 6 — Ovary developmetal stages are shown as abbreviations: TYS, tertiary yolk stage; MNS, migration nuclear stage; PMA, pre-maturation stage; MA, maturation oocytes. Lunar-phase are abbreviated as LQM, last-quarter moon; NewM: new moon. “+” and “-” mean after and before the lunar phase (e.g., “NewM+1” means 1 day after new moon). [file peerj-11-15991-s006.xls]

## Sheet: Table S4
Table S4. Size, gonadsomatic index (GSI) and ovary developmental stage in relation to sampling date for Lutjanus fulviflamma.
Ovary developmetal stages are shown as abbreviations: TYS = tertiary yolk stage; MNS = migration nuclear stage; PMA = pre-maturation stage;
MA = maturation oocytes. Lunar-phase are abbreviated as LQM: last-quarter moon; NewM: new moon. "+" and "-" mean after and before
the lunar phase (e.g. "NewM+1" means 1 day after new moon).
Date	Lunar phase	Sample No.	Fork length	Whole body weight	Gonad weight	GSI	Ovary developmental	Hydrated stage
			(mm)	(g)	(g)		stage
2021-04-04	LQM	1	248	302	19.57	6.92915	MA	Yes
2021-05-13	NewM+1	1	259.5	316	18.1	6.07586	MN	Yes
2021-05-13	NewM+1	2	275.5	358	22.22	6.61743	MN	Yes
2021-06-01	LQM-1	1	229.5	222	16.57	8.06601	MA	Yes
2021-06-10	NewM	1	269.5	366	17.84	5.12408	MN	Yes
2021-06-10	NewM	2	220	192	6.76	3.64932	MN	Yes
2021-07-01	LQM-1	1	271	370	16.81	4.75948	MN	Yes
2021-07-01	LQM-1	2	216.5	206	17.51	9.28962	PMA	Yes
2021-07-01	LQM-1	3	250.5	298	14.89	5.25944	MA	Yes
2021-07-01	LQM-1	4	215	200	14.46	7.79347	PMA	Yes
2021-07-01	LQM-1	5	232	258	16.01	6.61598	MN	Yes
2021-07-01	LQM-1	6	206	170	5.65	3.43779	MN	Yes
2021-07-10	NewM	1	295.5	468	15.7	3.47115	TYS	No
2021-07-10	NewM	2	239.5	272	12.75	4.91803	MN	Yes
2021-07-10	NewM	3	198.5	162	6.08	3.89944	MN	Yes
2021-07-10	NewM	4	269.5	350	12.35	3.66	TYS	No
2021-07-10	NewM	5	262.5	338	15.88	4.92984	MN	Yes
2021-07-10	NewM	6	260	298	11.6	4.05028	MN	Yes
2021-07-10	NewM	7	248	276	16	6.15385	MA	Yes
2021-07-10	NewM	8	237.5	246	16.5	7.18954	MA	Yes
2021-07-10	NewM	9	224.5	218	18.64	9.34992	MA	Yes
2021-07-31	LQM	1	220	204	13.14	6.88463	MA	Yes
2021-08-09	NewM+1	1	273	368	15.52	4.40309	TYS	No
2021-08-09	NewM+1	2	269	384	32.93	9.3799	MN	Yes
2021-08-09	NewM+1	3	285	450	31.32	7.48065	PMA	Yes
2021-08-09	NewM+1	4	235	264	23.38	9.71657	PMA	Yes
2021-08-09	NewM+1	5	257.5	308	13.66	4.64089	PMA	Yes
2021-08-09	NewM+1	6	226	220	14.86	7.24383	TYS	No
2021-08-09	NewM+1	7	247	250	14.2	6.02205	PMA	Yes
2021-08-09	NewM+1	8	254.5	304	24.58	8.79679	MN	Yes
2021-08-09	NewM+1	9	249.5	300	19.8	7.06638	MN	Yes
2021-08-09	NewM+1	10	263	312	18.91	6.45194	MN	Yes
2021-09-07	NewM	1	244.5	260	9.28	3.70134	MN	Yes
2021-09-07	NewM	2	264	386	48.91	14.5095	MA	Yes
2021-09-07	NewM	3	250	302	15.78	5.51324	PMA	Yes
2021-09-07	NewM	4	247.5	282	11.77	4.35555	PMA	Yes
2021-10-02	LQM+3	1	241	258	18.03	7.51344	PMA	Yes
2021-10-02	LQM+3	2	222.5	220	15.19	7.41663	PMA	Yes
2021-10-07	NewM+1	1	207	174	11.2	6.87961	PMA	Yes
2021-10-07	NewM+1	2	265.5	372	19.52	5.5379	PMA	Yes
2021-10-07	NewM+1	3	271	384	17.7	4.8321	MA	Yes
