# Supplementary material for: Spawning aggregations of checkered snapper (Lutjanus decussatus) and blackspot snapper (L. fulviflamma): seasonality, lunar-phase periodicity and spatial distribution within spawning ground
Source: PeerJ. 2023 Sep 11;11:e15991. doi: 10.7717/peerj.15991 (PMC10710171; doi:10.7717/peerj.15991)
Supplement: Supplemental Information 9 [file peerj-11-15991-s009.xls]

## Sheet: Fish data
Year	Date	Fish density data in (A)	Fish density data in (B)	GSI data in (C)	Ovary developmental stage data in (C)
2020	November 8	10
2020	November 15	8
2020	December 8	6
2020	December 15	3
2021	January 5	3
2021	January 13	9
2021	February 5	7
2021	Feburuary 13	7
2021	March 5	2
2021	March 13	5
2021	April 4	58	58
2021	April 11	6	6
2021	May 3	903	903	See Table S3	See Table S3
2021	May 13	4	4
2021	May 22	4	4
2021	May 26	8	8
2021	June 1	1565	1565	See Table S3	See Table S3
2021	June 10	663	663	See Table S3	See Table S3
2021	June 17	3	3
2021	June 25	6	6
2021	July 1	877	877	See Table S3	See Table S3
2021	July 10	502	502	See Table S3	See Table S3
2021	July 17	5	5
2021	July 31	939	939	See Table S3	See Table S3
2021	Ausgut 9	554	554	See Table S3	See Table S3
2021	August 16	1	1
2021	August 24	4	4
2021	August 29	901	901	See Table S3	See Table S3
2021	September 7	78	78	See Table S3	See Table S3
2021	Setember 16	2	2
2021	September 21	2	2
2021	October 2	529	529	See Table S3	See Table S3
2021	October 7	6	6
2021	October 15	3	3
2021	October 20	4	4
2021	October 29	6	6
2021	November 5	6	6

## Sheet: Water temperature
Date	Water temperature (oC)
2020-11-01	25.658
2020-11-02	25.963
2020-11-03	26.11
2020-11-04	25.457
2020-11-05	25.382
2020-11-06	25.836
2020-11-07	26.361
2020-11-08	26.733
2020-11-09	25.448
2020-11-10	24.982
2020-11-11	24.743
2020-11-12	24.755
2020-11-13	24.168
2020-11-14	24.231
2020-11-15	24.761
2020-11-16	25.329
2020-11-17	25.309
2020-11-18	25.636
2020-11-19	25.97
2020-11-20	26.283
2020-11-21	26.119
2020-11-22	26.09
2020-11-23	25.983
2020-11-24	25.391
2020-11-25	25.12
2020-11-26	25.057
2020-11-27	24.9
2020-11-28	24.497
2020-11-29	24.082
2020-11-30	23.886
2020-12-01	23.776
2020-12-02	23.954
2020-12-03	23.719
2020-12-04	23.568
2020-12-05	23.443
2020-12-06	23.167
2020-12-07	23.439
2020-12-08	23.709
2020-12-09	23.391
2020-12-10	23.341
2020-12-11	23.505
2020-12-12	23.197
2020-12-13	23.152
2020-12-14	23.138
2020-12-15	23.248
2020-12-16	22.506
2020-12-17	21.802
2020-12-18	23.05
2020-12-19	22.545
2020-12-20	21.925
2020-12-21	21.414
2020-12-22	21.579
2020-12-23	21.994
2020-12-24	22.579
2020-12-25	21.998
2020-12-26	22.038
2020-12-27	22.526
2020-12-28	22.377
2020-12-29	22.713
2020-12-30	22.642
2020-12-31	22.139
2021-01-01	21.076
2021-01-02	20.25
2021-01-03	22.381
2021-01-04	23.21
2021-01-05	22.906
2021-01-06	21.529
2021-01-07	21.303
2021-01-08	21.189
2021-01-09	20.971
2021-01-10	20.899
2021-01-11	20.796
2021-01-12	21.213
2021-01-13	20.131
2021-01-14	21.479
2021-01-15	22.049
2021-01-16	22
2021-01-17	20.937
2021-01-18	20.531
2021-01-19	20.71
2021-01-20	21.114
2021-01-21	21.723
2021-01-22	21.809
2021-01-23	22.299
2021-01-24	22.118
2021-01-25	22.224
2021-01-26	22.334
2021-01-27	21.999
2021-01-28	22.064
2021-01-29	22.029
2021-01-30	21.751
2021-01-31	21.997
2021-02-01	22.379
2021-02-02	22.229
2021-02-03	21.306
2021-02-04	22.139
2021-02-05	22.17
2021-02-06	23.059
2021-02-07	23.233
2021-02-08	22.717
2021-02-09	22.529
2021-02-10	22.538
2021-02-11	22.237
2021-02-12	22.784
2021-02-13	23.054
2021-02-14	22.99
2021-02-15	22.592
2021-02-16	22.123
2021-02-17	22.475
2021-02-18	21.401
2021-02-19	21.939
2021-02-20	22.373
2021-02-21	22.03
2021-02-22	22.78
2021-02-23	22.575
2021-02-24	22.819
2021-02-25	22.523
2021-02-26	22.849
2021-02-27	23.04
2021-02-28	23.08
2021-03-01	23.703
2021-03-02	23.649
2021-03-03	23.237
2021-03-04	22.49
2021-03-05	22.718
2021-03-06	22.791
2021-03-07	23.438
2021-03-08	23.638
2021-03-09	23.367
2021-03-10	23.328
2021-03-11	23.277
2021-03-12	23.557
2021-03-13	22.988
2021-03-14	22.726
2021-03-15	22.765
2021-03-16	23.279
2021-03-17	23.521
2021-03-18	23.93
2021-03-19	23.976
2021-03-20	24.165
2021-03-21	24.136
2021-03-22	22.818
2021-03-23	22.9
2021-03-24	22.687
2021-03-25	22.967
2021-03-26	23.157
2021-03-27	23.252
2021-03-28	23.681
2021-03-29	24.014
2021-03-30	24.403
2021-03-31	24.631
2021-04-01	24.653
2021-04-02	24.802
2021-04-03	25.335
2021-04-04	25.523
2021-04-05	24.954
2021-04-06	24.778
2021-04-07	24.506
2021-04-08	24.054
2021-04-09	24.228
2021-04-10	24.177
2021-04-11	24.264
2021-04-12	24.833
2021-04-13	25.531
2021-04-14	25.38
2021-04-15	24.695
2021-04-16	24.778
2021-04-17	24.792
2021-04-18	24.028
2021-04-19	23.696
2021-04-20	23.683
2021-04-21	23.496
2021-04-22	23.685
2021-04-23	23.841
2021-04-24	23.701
2021-04-25	23.961
2021-04-26	23.998
2021-04-27	24.147
2021-04-28	24.448
2021-04-29	24.739
2021-04-30	25.066
2021-05-01	25.157
2021-05-02	25.467
2021-05-03	25.262
2021-05-04	25.262
2021-05-05	25.511
2021-05-06	26.562
2021-05-07	26.895
2021-05-08	26.982
2021-05-09	27.392
2021-05-10	27.313
2021-05-11	27.26
2021-05-12	27.539
2021-05-13	27.791
2021-05-14	27.625
2021-05-15	27.714
2021-05-16	27.626
2021-05-17	27.875
2021-05-18	28.023
2021-05-19	28.232
2021-05-20	28.438
2021-05-21	28.5
2021-05-22	28.876
2021-05-23	28.964
2021-05-24	29.311
2021-05-25	29.707
2021-05-26	28.762
2021-05-27	28.973
2021-05-28	28.69
2021-05-29	28.75
2021-05-30	28.518
2021-05-31	28.723
2021-06-01	28.864
2021-06-02	29.145
2021-06-03	29.349
2021-06-04	29.617
2021-06-05	29.19
2021-06-06	28.785
2021-06-07	28.48
2021-06-08	28.147
2021-06-09	28.132
2021-06-10	28.495
2021-06-11	28.746
2021-06-12	29.307
2021-06-13	29.019
2021-06-14	28.968
2021-06-15	29.512
2021-06-16	29.641
2021-06-17	30.249
2021-06-18	30.514
2021-06-19	31.585
2021-06-20	31.156
2021-06-21	31.268
2021-06-22	30.672
2021-06-23	30.537
2021-06-24	29.677
2021-06-25	29.735
2021-06-26	29.838
2021-06-27	29.131
2021-06-28	29.068
2021-06-29	28.9
2021-06-30	28.986
2021-07-01	29.372
2021-07-02	29.242
2021-07-03	29.261
2021-07-04	29.627
2021-07-05	29.782
2021-07-06	29.591
2021-07-07	29.929
2021-07-08	30.329
2021-07-09	30.43
2021-07-10	30.576
2021-07-11	30.501
2021-07-12	30.566
2021-07-13	30.527
2021-07-14	30.466
2021-07-15	30.26
2021-07-16	30.062
2021-07-17	30.2
2021-07-18	30.187
2021-07-19	30.327
2021-07-20	30.327
2021-07-21	29.564
2021-07-22	29.259
2021-07-23	28.958
2021-07-24	28.538
2021-07-25	28.585
2021-07-26	28.926
2021-07-27	29.499
2021-07-28	29.431
2021-07-29	29.596
2021-07-30	30.065
2021-07-31	30.07
2021-08-01	30.169
2021-08-02	29.986
2021-08-03	30.306
2021-08-04	30.249
2021-08-05	30.225
2021-08-06	29.798
2021-08-07	29.148
2021-08-08	28.917
2021-08-09	29.176
2021-08-10	28.989
2021-08-11	29.256
2021-08-12	28.958
2021-08-13	28.711
2021-08-14	28.873
2021-08-15	29.251
2021-08-16	29.401
2021-08-17	29.835
2021-08-18	29.7
2021-08-19	30.072
2021-08-20	30.296
2021-08-21	30.414
2021-08-22	29.734
2021-08-23	29.241
2021-08-24	29.37
2021-08-25	29.563
2021-08-26	29.622
2021-08-27	29.569
2021-08-28	29.94
2021-08-29	30.102
2021-08-30	30.108
2021-08-31	30.175
2021-09-01	30.41
2021-09-02	29.672
2021-09-03	30.267
2021-09-04	30.382
2021-09-05	29.997
2021-09-06	30.653
2021-09-07	30.945
2021-09-08	30.457
2021-09-09	30.041
2021-09-10	29.999
2021-09-11	29.554
2021-09-12	28.991
2021-09-13	28.568
2021-09-14	28.961
2021-09-15	28.693
2021-09-16	29.06
2021-09-17	29.468
2021-09-18	29.43
2021-09-19	30.253
2021-09-20	30.399
2021-09-21	30.106
2021-09-22	30.111
2021-09-23	30.234
2021-09-24	29.833
2021-09-25	29.64
2021-09-26	29.814
2021-09-27	29.865
2021-09-28	29.621
2021-09-29	29.691
2021-09-30	29.935
2021-10-01	30.046
2021-10-02	29.846
2021-10-03	29.551
2021-10-04	29.662
2021-10-05	29.345
2021-10-06	29.05
2021-10-07	28.874
2021-10-08	28.75
2021-10-09	28.713
2021-10-10	28.831
2021-10-11	28.222
2021-10-12	28.428
2021-10-13	28.309
2021-10-14	28.486
2021-10-15	28.497
2021-10-16	28.77
2021-10-17	27.647
2021-10-18	27.38
2021-10-19	27.181
2021-10-20	26.955
2021-10-21	27.434
2021-10-22	26.496
2021-10-23	26.27
2021-10-24	26.197
2021-10-25	26.269
2021-10-26	26.201
2021-10-27	26.235
2021-10-28	25.854
2021-10-29	25.333
2021-10-30	26.404
2021-10-31	26.082
2021-11-01	26.23
2021-11-02	26.27
2021-11-03	26.276
2021-11-04	26.179
2021-11-05	26.492
2021-11-06	26.802
2021-11-07	27.04
2021-11-08	26.887
2021-11-09	25.715
2021-11-10	24.903
2021-11-11	24.959
2021-11-12	24.661
2021-11-13	24.527
2021-11-14	24.827
2021-11-15	24.522
2021-11-16	24.878
2021-11-17	25.508
2021-11-18	25.598
2021-11-19	25.904
2021-11-20	25.981
2021-11-21	25.998
2021-11-22	26.248
2021-11-23	25.021
2021-11-24	24.684
2021-11-25	24.685
2021-11-26	24.821
2021-11-27	23.908
2021-11-28	23.525
2021-11-29	23.42
2021-11-30	24.925
2021-12-01	25.142
2021-12-02	25.134
2021-12-03	23.891
2021-12-04	22.655
2021-12-05	22.813
2021-12-06	23.836
2021-12-07	23.721
2021-12-08	23.619
2021-12-09	24.111
2021-12-10	23.732
2021-12-11	23.592
2021-12-12	23.873
2021-12-13	24.652
2021-12-14	24.949
2021-12-15	24.144
2021-12-16	24.656
2021-12-17	24.128
2021-12-18	24.559
2021-12-19	23.743
2021-12-20	23.019
2021-12-21	23.385
2021-12-22	24.121
2021-12-23	24.467
2021-12-24	24.63
2021-12-25	24.294
2021-12-26	23.766
2021-12-27	23.324
2021-12-28	23.319
2021-12-29	23.929
2021-12-30	23.768
2021-12-31	23.636
2022-01-01	23.002
2022-01-02	23.136
2022-01-03	22.697
2022-01-04	23.29
2022-01-05	23.277
2022-01-06	23.237
2022-01-07	22.91
2022-01-08	22.751
2022-01-09	23.38
2022-01-10	22.561
2022-01-11	22.977
2022-01-12	23.134
2022-01-13	23.02
2022-01-14	22.789
2022-01-15	22.949
2022-01-16	22.716
2022-01-17	22.987
2022-01-18	22.779
2022-01-19	21.91
2022-01-20	21.744
2022-01-21	21.438
2022-01-22	22.113
2022-01-23	22.553
2022-01-24	22.688
2022-01-25	22.386
2022-01-26	22.444
2022-01-27	22.396
2022-01-28	22.756
2022-01-29	23.082
2022-01-30	23.034
2022-01-31	22.592
