# Supplementary material for: Spawning aggregations of checkered snapper (Lutjanus decussatus) and blackspot snapper (L. fulviflamma): seasonality, lunar-phase periodicity and spatial distribution within spawning ground
Source: PeerJ. 2023 Sep 11;11:e15991. doi: 10.7717/peerj.15991 (PMC10710171; doi:10.7717/peerj.15991)
Supplement: Supplemental Information 10 [file peerj-11-15991-s010.xls]

## Sheet: Fish data
Year	Date	Fish density data in (A)	Fish density data in (B)	GSI data in (C)	Ovary developmental stage data in (C)
2020	November 8	3
2020	November 15	4
2020	December 8	5
2020	December 15	3
2021	January 5	6
2021	January 13	1
2021	February 5	0
2021	Feburuary 13	1
2021	March 5	0
2021	March 13	16
2021	April 4	1521	1521	See Table S4	See Table S4
2021	April 11	14	14
2021	May 3	4040	4040
2021	May 13	1372	1372	See Table S4	See Table S4
2021	May 22	227	227
2021	May 26	324	324
2021	June 1	6337	6337	See Table S4	See Table S4
2021	June 10	2499	2499	See Table S4	See Table S4
2021	June 17	252	252
2021	June 25	2	2
2021	July 1	1637	1637	See Table S4	See Table S4
2021	July 10	3000	3000	See Table S4	See Table S4
2021	July 17	498	498
2021	July 31	189	189	See Table S4	See Table S4
2021	Ausgut 9	3495	3495	See Table S4	See Table S4
2021	August 16	346	346
2021	August 24	5	5
2021	August 29	258	258
2021	September 7	660	660	See Table S4	See Table S4
2021	Setember 16	422	422
2021	September 21	27	27
2021	October 2	765	765	See Table S4	See Table S4
2021	October 7	418	418	See Table S4	See Table S4
2021	October 15	43	43
2021	October 20	7	7
2021	October 29	4	4
2021	November 5	5	5

## Sheet: Water temperature
Date	Water temperature (oC)
2020-11-01	25.658
2020-11-02	25.963
2020-11-03	26.11
2020-11-04	25.457
2020-11-05	25.382
2020-11-06	25.836
2020-11-07	26.361
2020-11-08	26.733
2020-11-09	25.448
2020-11-10	24.982
2020-11-11	24.743
2020-11-12	24.755
2020-11-13	24.168
2020-11-14	24.231
2020-11-15	24.761
2020-11-16	25.329
2020-11-17	25.309
2020-11-18	25.636
2020-11-19	25.97
2020-11-20	26.283
2020-11-21	26.119
2020-11-22	26.09
2020-11-23	25.983
2020-11-24	25.391
2020-11-25	25.12
2020-11-26	25.057
2020-11-27	24.9
2020-11-28	24.497
2020-11-29	24.082
2020-11-30	23.886
2020-12-01	23.776
2020-12-02	23.954
2020-12-03	23.719
2020-12-04	23.568
2020-12-05	23.443
2020-12-06	23.167
2020-12-07	23.439
2020-12-08	23.709
2020-12-09	23.391
2020-12-10	23.341
2020-12-11	23.505
2020-12-12	23.197
2020-12-13	23.152
2020-12-14	23.138
2020-12-15	23.248
2020-12-16	22.506
2020-12-17	21.802
2020-12-18	23.05
2020-12-19	22.545
2020-12-20	21.925
2020-12-21	21.414
2020-12-22	21.579
2020-12-23	21.994
2020-12-24	22.579
2020-12-25	21.998
2020-12-26	22.038
2020-12-27	22.526
2020-12-28	22.377
2020-12-29	22.713
2020-12-30	22.642
2020-12-31	22.139
2021-01-01	21.076
2021-01-02	20.25
2021-01-03	22.381
2021-01-04	23.21
2021-01-05	22.906
2021-01-06	21.529
2021-01-07	21.303
2021-01-08	21.189
2021-01-09	20.971
2021-01-10	20.899
2021-01-11	20.796
2021-01-12	21.213
2021-01-13	20.131
2021-01-14	21.479
2021-01-15	22.049
2021-01-16	22
2021-01-17	20.937
2021-01-18	20.531
2021-01-19	20.71
2021-01-20	21.114
2021-01-21	21.723
2021-01-22	21.809
2021-01-23	22.299
2021-01-24	22.118
2021-01-25	22.224
2021-01-26	22.334
2021-01-27	21.999
2021-01-28	22.064
2021-01-29	22.029
2021-01-30	21.751
2021-01-31	21.997
2021-02-01	22.379
2021-02-02	22.229
2021-02-03	21.306
2021-02-04	22.139
2021-02-05	22.17
2021-02-06	23.059
2021-02-07	23.233
2021-02-08	22.717
2021-02-09	22.529
2021-02-10	22.538
2021-02-11	22.237
2021-02-12	22.784
2021-02-13	23.054
2021-02-14	22.99
2021-02-15	22.592
2021-02-16	22.123
2021-02-17	22.475
2021-02-18	21.401
2021-02-19	21.939
2021-02-20	22.373
2021-02-21	22.03
2021-02-22	22.78
2021-02-23	22.575
2021-02-24	22.819
2021-02-25	22.523
2021-02-26	22.849
2021-02-27	23.04
2021-02-28	23.08
2021-03-01	23.703
2021-03-02	23.649
2021-03-03	23.237
2021-03-04	22.49
2021-03-05	22.718
2021-03-06	22.791
2021-03-07	23.438
2021-03-08	23.638
2021-03-09	23.367
2021-03-10	23.328
2021-03-11	23.277
2021-03-12	23.557
2021-03-13	22.988
2021-03-14	22.726
2021-03-15	22.765
2021-03-16	23.279
2021-03-17	23.521
2021-03-18	23.93
2021-03-19	23.976
2021-03-20	24.165
2021-03-21	24.136
2021-03-22	22.818
2021-03-23	22.9
2021-03-24	22.687
2021-03-25	22.967
2021-03-26	23.157
2021-03-27	23.252
2021-03-28	23.681
2021-03-29	24.014
2021-03-30	24.403
2021-03-31	24.631
2021-04-01	24.653
2021-04-02	24.802
2021-04-03	25.335
2021-04-04	25.523
2021-04-05	24.954
2021-04-06	24.778
2021-04-07	24.506
2021-04-08	24.054
2021-04-09	24.228
2021-04-10	24.177
2021-04-11	24.264
2021-04-12	24.833
2021-04-13	25.531
2021-04-14	25.38
2021-04-15	24.695
2021-04-16	24.778
2021-04-17	24.792
2021-04-18	24.028
2021-04-19	23.696
2021-04-20	23.683
2021-04-21	23.496
2021-04-22	23.685
2021-04-23	23.841
2021-04-24	23.701
2021-04-25	23.961
2021-04-26	23.998
2021-04-27	24.147
2021-04-28	24.448
2021-04-29	24.739
2021-04-30	25.066
2021-05-01	25.157
2021-05-02	25.467
2021-05-03	25.262
2021-05-04	25.262
2021-05-05	25.511
2021-05-06	26.562
2021-05-07	26.895
2021-05-08	26.982
2021-05-09	27.392
2021-05-10	27.313
2021-05-11	27.26
2021-05-12	27.539
2021-05-13	27.791
2021-05-14	27.625
2021-05-15	27.714
2021-05-16	27.626
2021-05-17	27.875
2021-05-18	28.023
2021-05-19	28.232
2021-05-20	28.438
2021-05-21	28.5
2021-05-22	28.876
2021-05-23	28.964
2021-05-24	29.311
2021-05-25	29.707
2021-05-26	28.762
2021-05-27	28.973
2021-05-28	28.69
2021-05-29	28.75
2021-05-30	28.518
2021-05-31	28.723
2021-06-01	28.864
2021-06-02	29.145
2021-06-03	29.349
2021-06-04	29.617
2021-06-05	29.19
2021-06-06	28.785
2021-06-07	28.48
2021-06-08	28.147
2021-06-09	28.132
2021-06-10	28.495
2021-06-11	28.746
2021-06-12	29.307
2021-06-13	29.019
2021-06-14	28.968
2021-06-15	29.512
2021-06-16	29.641
2021-06-17	30.249
2021-06-18	30.514
2021-06-19	31.585
2021-06-20	31.156
2021-06-21	31.268
2021-06-22	30.672
2021-06-23	30.537
2021-06-24	29.677
2021-06-25	29.735
2021-06-26	29.838
2021-06-27	29.131
2021-06-28	29.068
2021-06-29	28.9
2021-06-30	28.986
2021-07-01	29.372
2021-07-02	29.242
2021-07-03	29.261
2021-07-04	29.627
2021-07-05	29.782
2021-07-06	29.591
2021-07-07	29.929
2021-07-08	30.329
2021-07-09	30.43
2021-07-10	30.576
2021-07-11	30.501
2021-07-12	30.566
2021-07-13	30.527
2021-07-14	30.466
2021-07-15	30.26
2021-07-16	30.062
2021-07-17	30.2
2021-07-18	30.187
2021-07-19	30.327
2021-07-20	30.327
2021-07-21	29.564
2021-07-22	29.259
2021-07-23	28.958
2021-07-24	28.538
2021-07-25	28.585
2021-07-26	28.926
2021-07-27	29.499
2021-07-28	29.431
2021-07-29	29.596
2021-07-30	30.065
2021-07-31	30.07
2021-08-01	30.169
2021-08-02	29.986
2021-08-03	30.306
2021-08-04	30.249
2021-08-05	30.225
2021-08-06	29.798
2021-08-07	29.148
2021-08-08	28.917
2021-08-09	29.176
2021-08-10	28.989
2021-08-11	29.256
2021-08-12	28.958
2021-08-13	28.711
2021-08-14	28.873
2021-08-15	29.251
2021-08-16	29.401
2021-08-17	29.835
2021-08-18	29.7
2021-08-19	30.072
2021-08-20	30.296
2021-08-21	30.414
2021-08-22	29.734
2021-08-23	29.241
2021-08-24	29.37
2021-08-25	29.563
2021-08-26	29.622
2021-08-27	29.569
2021-08-28	29.94
2021-08-29	30.102
2021-08-30	30.108
2021-08-31	30.175
2021-09-01	30.41
2021-09-02	29.672
2021-09-03	30.267
2021-09-04	30.382
2021-09-05	29.997
2021-09-06	30.653
2021-09-07	30.945
2021-09-08	30.457
2021-09-09	30.041
2021-09-10	29.999
2021-09-11	29.554
2021-09-12	28.991
2021-09-13	28.568
2021-09-14	28.961
2021-09-15	28.693
2021-09-16	29.06
2021-09-17	29.468
2021-09-18	29.43
2021-09-19	30.253
2021-09-20	30.399
2021-09-21	30.106
2021-09-22	30.111
2021-09-23	30.234
2021-09-24	29.833
2021-09-25	29.64
2021-09-26	29.814
2021-09-27	29.865
2021-09-28	29.621
2021-09-29	29.691
2021-09-30	29.935
2021-10-01	30.046
2021-10-02	29.846
2021-10-03	29.551
2021-10-04	29.662
2021-10-05	29.345
2021-10-06	29.05
2021-10-07	28.874
2021-10-08	28.75
2021-10-09	28.713
2021-10-10	28.831
2021-10-11	28.222
2021-10-12	28.428
2021-10-13	28.309
2021-10-14	28.486
2021-10-15	28.497
2021-10-16	28.77
2021-10-17	27.647
2021-10-18	27.38
2021-10-19	27.181
2021-10-20	26.955
2021-10-21	27.434
2021-10-22	26.496
2021-10-23	26.27
2021-10-24	26.197
2021-10-25	26.269
2021-10-26	26.201
2021-10-27	26.235
2021-10-28	25.854
2021-10-29	25.333
2021-10-30	26.404
2021-10-31	26.082
2021-11-01	26.23
2021-11-02	26.27
2021-11-03	26.276
2021-11-04	26.179
2021-11-05	26.492
2021-11-06	26.802
2021-11-07	27.04
2021-11-08	26.887
2021-11-09	25.715
2021-11-10	24.903
2021-11-11	24.959
2021-11-12	24.661
2021-11-13	24.527
2021-11-14	24.827
2021-11-15	24.522
2021-11-16	24.878
2021-11-17	25.508
2021-11-18	25.598
2021-11-19	25.904
2021-11-20	25.981
2021-11-21	25.998
2021-11-22	26.248
2021-11-23	25.021
2021-11-24	24.684
2021-11-25	24.685
2021-11-26	24.821
2021-11-27	23.908
2021-11-28	23.525
2021-11-29	23.42
2021-11-30	24.925
2021-12-01	25.142
2021-12-02	25.134
2021-12-03	23.891
2021-12-04	22.655
2021-12-05	22.813
2021-12-06	23.836
2021-12-07	23.721
2021-12-08	23.619
2021-12-09	24.111
2021-12-10	23.732
2021-12-11	23.592
2021-12-12	23.873
2021-12-13	24.652
2021-12-14	24.949
2021-12-15	24.144
2021-12-16	24.656
2021-12-17	24.128
2021-12-18	24.559
2021-12-19	23.743
2021-12-20	23.019
2021-12-21	23.385
2021-12-22	24.121
2021-12-23	24.467
2021-12-24	24.63
2021-12-25	24.294
2021-12-26	23.766
2021-12-27	23.324
2021-12-28	23.319
2021-12-29	23.929
2021-12-30	23.768
2021-12-31	23.636
2022-01-01	23.002
2022-01-02	23.136
2022-01-03	22.697
2022-01-04	23.29
2022-01-05	23.277
2022-01-06	23.237
2022-01-07	22.91
2022-01-08	22.751
2022-01-09	23.38
2022-01-10	22.561
2022-01-11	22.977
2022-01-12	23.134
2022-01-13	23.02
2022-01-14	22.789
2022-01-15	22.949
2022-01-16	22.716
2022-01-17	22.987
2022-01-18	22.779
2022-01-19	21.91
2022-01-20	21.744
2022-01-21	21.438
2022-01-22	22.113
2022-01-23	22.553
2022-01-24	22.688
2022-01-25	22.386
2022-01-26	22.444
2022-01-27	22.396
2022-01-28	22.756
2022-01-29	23.082
2022-01-30	23.034
2022-01-31	22.592
