# Supplementary material for: Spawning aggregations of checkered snapper (Lutjanus decussatus) and blackspot snapper (L. fulviflamma): seasonality, lunar-phase periodicity and spatial distribution within spawning ground
Source: PeerJ. 2023 Sep 11;11:e15991. doi: 10.7717/peerj.15991 (PMC10710171; doi:10.7717/peerj.15991)
Supplement: Supplemental Information 12 [file peerj-11-15991-s012.xls]

## Sheet: Fig 5 raw data
1-minute sub-transect	Fish density (per 20 m x 5 m) for each section
Section	April 4	April 11	May 3	May 13	June 1	June 10	July 1	July 10	July 31	August 9	August 29	September 7	October 2	October 7
1	0	0	0	0	4.61538	0.909091	1	8.18182	80	15.2	34.2857	1.17647	3.33333	0.869565
2	0	0	1.11111	0	105.217	13.0435	14.5455	40	60	41.5385	79	8.23529	19.0909	0
3	3.2	0	2.22222	0.740741	200	22.8571	12.1739	35.7895	39.1667	40	46.3158	2.5	44.3478	0.909091
4	0.714286	0	20	0	25	16.6667	32	24.7059	22.7273	18.2609	6.31579	11.25	17.3913	0.740741
5	4.82759	0	21.0526	0	76.1905	34	45	4.44444	61.8182	44.3478	70.5263	0	39.1667	0
6	0.8	0	20	0	94.1176	41.7391	2.72727	50	6.36364	23.4783	51.7647	5.88235	40	0.408163
7	0	0	93.3333	0	77.7778	41.9048	7.61905	45.7143	24	46.6667	57	4.70588	41.8182	0
8	2.4	0	3.75	0	125	38.0952	15.7895	30.4762	46.087	46.087	67.2727	11.7647	30.4	1.66667
9	0	0	9.41176	0.833333	100	40	21.0526	50.5263	14.6667	12.1739	12.1739	1.17647	10.8333	0
10	1.90476	0	20	0	18.8235	11.5789	16.4706	7.61905	20.9524	14.1667	12.6316	4	38	0
11	6.66667	0	22.5	0	6.66667	28.5714	20	26	2.72727	17.6	7	0	40	0
12	2.30769	0	13.3333	0	73.3333	23.0769	16.1905	14.5455	10.8333	18.2609	15.7895	0	14.7826	0
13	0	0	0	0	26.6667	22.8571	24.4444	8.88889	10	16.5217	12	0.869565	20	0
14	0	0	76.3636	0	77.6471	20	11.5789	8.18182	8.69565	3.47826	16.3636	1.25	5.21739	0
15	2.5	1.05263	16	0.714286	25.8824	2.85714	48.2353	13.3333	7.27273	7.85714	10.4348	6.66667	16.3636	0
16	2.6087	0	31.4286	0	29.0909	20	8.57143	10.9091	11.8182	0.869565	4.21053	1.11111	1.66667	0
17	8.33333	0	27.5	0	21.4286	8.75	18.9474	0	7	0	15.2941	0	5.83333	0
18	0	0	62.5	0	31.4286	0	4.70588	2	11.8182	0	0	1.42857	7.69231	0
19	0	0	75.5556	0	50.6667	17.6471	0	2.6087	0	21.8182	64.7619	1.17647	33.3333	0
20	2.5	0.952381	122.857	0	44.2857	62.1053	10.6667	1.73913	46.087	11.8519	46	2.10526	8.88889	0
21	3.33333	0	0	0	33.8462	38.0952	0	67.2727	95	6.4	91.5789	1.05263	1.37931	0
22	2.72727	0	1.73913	0.769231	18.8889	16.8421	33.3333	2.5	49.0909	0.740741	27	0	0	0
23	2.6087	0	13.3333	0	0	6.95652	42.8571	0.833333	8.69565	0	2	0	18	0
24	0	0	73.6842		12.5	0	72.9412	0	27.2727	24	26.6667	1.17647	17.1429	0
25	0.833333	0	61.9048		6.66667	13.3333	61.1111	5	60	17.3913	29.5652	1.11111	16.6667	0
26		0	76.1905		29.4118	31.1111	25	10.7692	52	21.5385	24.7619	1.17647	4.44444
27		1.05263	42		24	40.9091	16.25	13.6364	32.8	5	30.4762	3.15789	0
28		4.28571	19.1304		138.667	31	6.25	1.66667	19.0909	0	38.8889	0
29		0	0		28.2353	4.54545	2.35294		0		1.81818	1.05263
30		0	55.5556		25	3.07692	9.41176				0	4.70588
31		0	57.1429		31.1111		108.235					4.70588
32		0	80		31.5789		28.5714					4.70588
33		0	34.4444		37.3333		200					2
34			7.36842		75		40					1.17647
35			1.05263		58.8235		8.88889
36			1.81818		38.75		0
37					7.82609		0
38					0		0
39							0
40							0
