# Supplementary material for: Spawning aggregations of checkered snapper (Lutjanus decussatus) and blackspot snapper (L. fulviflamma): seasonality, lunar-phase periodicity and spatial distribution within spawning ground
Source: PeerJ. 2023 Sep 11;11:e15991. doi: 10.7717/peerj.15991 (PMC10710171; doi:10.7717/peerj.15991)
Supplement: Supplemental Information 13 [file peerj-11-15991-s013.xls]

## Sheet: Sheet1
		Range of fish density				Frequency (number of 1-minute sub-transect)
		(per 20 m x 5 m)				April 4	April 11	May 3	May 13	June 1	June 10	July 1	July 10	July 31	August 9	August 29	September 7	October 2	October 7
		0				9	29	4	19	2	2	7	2	2	4	2	8	2	20
0	<	fish density	<	20		16	4	12	4	6	12	18	17	12	15	12	27	16	5
20	<	fish density	<	40		0	0	8	0	15	11	7	4	6	4	7	0	5	0
40	<	fish density	<	60		0	0	3	0	3	4	4	4	4	5	4	0	4	0
60	<	fish density	<	80		0	0	6	0	5	1	2	1	3	0	4	0	0	0
80	<	fish density	<	100		0	0	2	0	1	0	0	0	2	0	1	0	0	0
100	<	fish density	<	120		0	0	0	0	2	0	1	0	0	0	0	0	0	0
120	<	fish density	<	140		0	0	1	0	2	0	0	0	0	0	0	0	0	0
140	<	fish density	<	160		0	0	0	0	0	0	0	0	0	0	0	0	0	0
160	<	fish density	<	180		0	0	0	0	0	0	0	0	0	0	0	0	0	0
180	<	fish density	<	200		0	0	0	0	0	0	0	0	0	0	0	0	0	0
200	<	fish density	<	220		0	0	0	0	1	0	1	0	0	0	0	0	0	0
