# Supplementary material for: Spawning aggregations of checkered snapper (Lutjanus decussatus) and blackspot snapper (L. fulviflamma): seasonality, lunar-phase periodicity and spatial distribution within spawning ground
Source: PeerJ. 2023 Sep 11;11:e15991. doi: 10.7717/peerj.15991 (PMC10710171; doi:10.7717/peerj.15991)
Supplement: Supplemental Information 14 [file peerj-11-15991-s014.xls]

## Sheet: Fig 7 raw data
1-minute sub-transect	Fish density (per 20 m x 5 m) for each section
Section	April 4	April 11	May 3	May 13	June 1	June 10	July 1	July 10	July 31	August 9	August 29	September 7	October 2	October 7
1	0	0	0	0	0	0	0	0	0	0	0	0	0	0
2	0	0	0	0	0	0	0	0	0	0	0	0	0	0
3	24	0	0	0	2	2.85714	0	1.05263	8.33333	10.5263	8.42105	0	0	0
4	0	0	0	0	135	22.2222	0	17.6471	4.54545	59.1304	24.2105	30	13.913	14.8148
5	0	0	0	0	47.619	8	0	8.88889	0	4.34783	0	25	0	0
6	0	0	0	7.69231	0	0.869565	0	7	0	0.869565	0	0	1.05263	0.816327
7	15.3846	0	0	0	0	1.90476	0	6.66667	0	0	0	0	0.909091	0
8	0	0	0	1.42857	0	0.952381	0	0	0	0	0	0	0	0
9	0	0	0	0	0	40	0	1.05263	9.33333	78.2609	2.6087	0	5.83333	9.16667
10	0	0	0	0	0	170.526	0	142.857	0.952381	39.1667	0	0	6	0.769231
11	0	0	0	0	266.667	95.2381	0	52	0	64	0	43.3333	5	1.66667
12	0	0	0	333.333	16	3.07692	0	83.6364	0	0	0	0	0	0
13	222.222	0	0	304.348	66.6667	0	0	0	0	0	0	0	0	0
14	560	0	0	64.2857	0	0	0	0	0	0	0	21.25	0	0
15	0	0	0	0	0	0	11.7647	0	0	71.4286	0	13.3333	4.54545	36.5217
16	43.4783	0	0	230.769	0	242.857	14.2857	6.36364	15.4545	434.783	14.7368	0	60.8333	71.6667
17	25.8333	0	0	120	0	100	84.2105	285.714	19	444.444	37.6471	0	54.1667	23.8462
18	240	0	0	53.8462	0	610.526	141.176	250	40	320	55.5556	0	19.2308	21.5385
19	81.8182	0	0	0	0	82.3529	187.5	217.391	3.33333	118.182	1.90476	2.35294	68.5714	36.5217
20	0	0.952381	0	0	4.28571	0	333.333	391.304	51.3043	185.185	10	8.42105	43.3333	75
21	0	0	1466.67	0	30.7692	9.52381	500	63.6364	1.66667	240	8.42105	78.9474	172.414	53.913
22	0	0	434.783	0	111.111	63.1579	55.5556	208.333	9.09091	444.444	26	141.176	137.931	0.952381
23	0	0	1111.11	0	875	347.826	91.4286	250	10.4348	244.8	81	133.333	1	0
24	0	0	0		1250	545.455	51.7647	576.923	0	8	0.952381	75.2941	0	0
25	0	0	0		1111.11	180.952	10	40	0	0	0	66.6667	0	0
26		0	0		588.235	0	37.5	0	0	0	0	23.5294	0
27		1.05263	400		533.333	0	75	0	0	0	0	22.1053	0
28		4.28571	260.87		93.3333	0	125	0	0	0	0	55.5556
29		0	700		117.647	0	235.294		0		0	21.0526
30		0	44.4444		2500	0	70.5882				0	1.17647
31		0	0		24.4444		0					0
32		0	0		0		0					0
33		0	0		0		0					0
34			0		0		0					0
35			0		0		0
36			0		0		0
37					0		0
38					0		0
39							0
40							0
