# Supplementary material for: Spawning aggregations of checkered snapper (Lutjanus decussatus) and blackspot snapper (L. fulviflamma): seasonality, lunar-phase periodicity and spatial distribution within spawning ground
Source: PeerJ. 2023 Sep 11;11:e15991. doi: 10.7717/peerj.15991 (PMC10710171; doi:10.7717/peerj.15991)
Supplement: Supplemental Information 15 [file peerj-11-15991-s015.xls]

## Sheet: Sheet1
		Range of fish density				Frequency (number of 1-minute sub-transect)
		(per 20 m x 5 m)				April 4	April 11	May 3	May 13	June 1	June 10	July 1	July 10	July 31	August 9	August 29	September 7	October 2	October 7
		0				17	31	29	15	19	11	24	9	17	11	18	18	12	12
0	<	fish density	<	20		1	2	0	2	3	7	3	7	10	4	7	4	9	6
20	<	fish density	<	40		2	0	0	0	2	1	1	0	0	1	3	6	0	4
40	<	fish density	<	60		1	0	1	1	1	1	2	2	2	1	1	2	2	1
60	<	fish density	<	80		0	0	0	1	1	1	2	1	0	3	0	3	2	2
80	<	fish density	<	100		1	0	0	0	1	2	2	1	0	0	1	0	0	0
100	<	fish density	<	120		0	0	0	0	2	1	0	0	0	1	0	0	0	0
120	<	fish density	<	140		0	0	0	1	1	0	1	0	0	0	0	1	1	0
140	<	fish density	<	160		0	0	0	0	0	0	1	1	0	0	0	1	0	0
160	<	fish density	<	180		0	0	0	0	0	1	0	0	0	0	0	0	1	0
180	<	fish density	<	200		0	0	0	0	0	1	1	0	0	1	0	0	0	0
200	<	fish density	<	220		0	0	0	0	0	0	0	2	0	0	0	0	0	0
220	<	fish density	<	240		1	0	0	1	0	0	1	0	0	0	0	0	0	0
240	<	fish density	<	260		1	0	0	0	0	1	0	2	0	2	0	0	0	0
260	<	fish density	<	280		0	0	1	1	1	0	0	0	0	0	0	0	0	0
280	<	fish density	<	300		0	0	0	1	0	0	0	1	0	0	0	0	0	0
300	<	fish density	<	320		0	0	0	0	0	0	0	0	0	0	0	0	0	0
320	<	fish density	<	340		0	0	0	0	0	0	1	0	0	1	0	0	0	0
340	<	fish density	<	360		0	0	0	0	0	1	0	0	0	0	0	0	0	0
360	<	fish density	<	380		0	0	0	0	0	0	0	0	0	0	0	0	0	0
380	<	fish density	<	400		0	0	0	0	0	0	0	1	0	0	0	0	0	0
400	<	fish density	<	420		0	0	1	0	0	0	0	0	0	0	0	0	0	0
420	<	fish density	<	440		0	0	1	0	0	0	0	0	0	1	0	0	0	0
440	<	fish density	<	460		0	0	0	0	0	0	0	0	0	2	0	0	0	0
460	<	fish density	<	480		0	0	0	0	0	0	0	0	0	0	0	0	0	0
480	<	fish density	<	500		0	0	0	0	0	0	0	0	0	0	0	0	0	0
500	<	fish density	<	520		0	0	0	0	0	0	1	0	0	0	0	0	0	0
520	<	fish density	<	540		0	0	0	0	1	0	0	0	0	0	0	0	0	0
540	<	fish density	<	560		0	0	0	0	0	1	0	0	0	0	0	0	0	0
560	<	fish density	<	580		1	0	0	0	0	0	0	1	0	0	0	0	0	0
580	<	fish density	<	600		0	0	0	0	1	0	0	0	0	0	0	0	0	0
600	<	fish density	<	620		0	0	0	0	0	1	0	0	0	0	0	0	0	0
620	<	fish density	<	640		0	0	0	0	0	0	0	0	0	0	0	0	0	0
640	<	fish density	<	660		0	0	0	0	0	0	0	0	0	0	0	0	0	0
660	<	fish density	<	680		0	0	0	0	0	0	0	0	0	0	0	0	0	0
680	<	fish density	<	700		0	0	0	0	0	0	0	0	0	0	0	0	0	0
700	<	fish density	<	720		0	0	1	0	0	0	0	0	0	0	0	0	0	0
720	<	fish density	<	740		0	0	0	0	0	0	0	0	0	0	0	0	0	0
740	<	fish density	<	760		0	0	0	0	0	0	0	0	0	0	0	0	0	0
760	<	fish density	<	780		0	0	0	0	0	0	0	0	0	0	0	0	0	0
780	<	fish density	<	800		0	0	0	0	0	0	0	0	0	0	0	0	0	0
800	<	fish density	<	820		0	0	0	0	0	0	0	0	0	0	0	0	0	0
820	<	fish density	<	840		0	0	0	0	0	0	0	0	0	0	0	0	0	0
840	<	fish density	<	860		0	0	0	0	0	0	0	0	0	0	0	0	0	0
860	<	fish density	<	880		0	0	0	0	1	0	0	0	0	0	0	0	0	0
880	<	fish density	<	900		0	0	0	0	0	0	0	0	0	0	0	0	0	0
900	<	fish density	<	920		0	0	0	0	0	0	0	0	0	0	0	0	0	0
920	<	fish density	<	940		0	0	0	0	0	0	0	0	0	0	0	0	0	0
940	<	fish density	<	960		0	0	0	0	0	0	0	0	0	0	0	0	0	0
960	<	fish density	<	980		0	0	0	0	0	0	0	0	0	0	0	0	0	0
980	<	fish density	<	1000		0	0	0	0	0	0	0	0	0	0	0	0	0	0
1000	<	fish density	<	1020		0	0	0	0	0	0	0	0	0	0	0	0	0	0
1020	<	fish density	<	1040		0	0	0	0	0	0	0	0	0	0	0	0	0	0
1040	<	fish density	<	1060		0	0	0	0	0	0	0	0	0	0	0	0	0	0
1060	<	fish density	<	1080		0	0	0	0	0	0	0	0	0	0	0	0	0	0
1080	<	fish density	<	1100		0	0	0	0	0	0	0	0	0	0	0	0	0	0
1100	<	fish density	<	1120		0	0	1	0	1	0	0	0	0	0	0	0	0	0
1120	<	fish density	<	1140		0	0	0	0	0	0	0	0	0	0	0	0	0	0
1140	<	fish density	<	1160		0	0	0	0	0	0	0	0	0	0	0	0	0	0
1160	<	fish density	<	1180		0	0	0	0	0	0	0	0	0	0	0	0	0	0
1180	<	fish density	<	1200		0	0	0	0	0	0	0	0	0	0	0	0	0	0
1200	<	fish density	<	1220		0	0	0	0	0	0	0	0	0	0	0	0	0	0
1220	<	fish density	<	1240		0	0	0	0	0	0	0	0	0	0	0	0	0	0
1240	<	fish density	<	1260		0	0	0	0	1	0	0	0	0	0	0	0	0	0
1260	<	fish density	<	1280		0	0	0	0	0	0	0	0	0	0	0	0	0	0
1280	<	fish density	<	1300		0	0	0	0	0	0	0	0	0	0	0	0	0	0
1300	<	fish density	<	1320		0	0	0	0	0	0	0	0	0	0	0	0	0	0
1320	<	fish density	<	1340		0	0	0	0	0	0	0	0	0	0	0	0	0	0
1340	<	fish density	<	1360		0	0	0	0	0	0	0	0	0	0	0	0	0	0
1360	<	fish density	<	1380		0	0	0	0	0	0	0	0	0	0	0	0	0	0
1380	<	fish density	<	1400		0	0	0	0	0	0	0	0	0	0	0	0	0	0
1400	<	fish density	<	1420		0	0	0	0	0	0	0	0	0	0	0	0	0	0
1420	<	fish density	<	1440		0	0	0	0	0	0	0	0	0	0	0	0	0	0
1440	<	fish density	<	1460		0	0	0	0	0	0	0	0	0	0	0	0	0	0
1460	<	fish density	<	1480		0	0	1	0	0	0	0	0	0	0	0	0	0	0
1480	<	fish density	<	1500		0	0	0	0	0	0	0	0	0	0	0	0	0	0
1500	<	fish density	<	1520		0	0	0	0	0	0	0	0	0	0	0	0	0	0
1520	<	fish density	<	1540		0	0	0	0	0	0	0	0	0	0	0	0	0	0
1540	<	fish density	<	1560		0	0	0	0	0	0	0	0	0	0	0	0	0	0
1560	<	fish density	<	1580		0	0	0	0	0	0	0	0	0	0	0	0	0	0
1580	<	fish density	<	1600		0	0	0	0	0	0	0	0	0	0	0	0	0	0
1600	<	fish density	<	1620		0	0	0	0	0	0	0	0	0	0	0	0	0	0
1620	<	fish density	<	1640		0	0	0	0	0	0	0	0	0	0	0	0	0	0
1640	<	fish density	<	1660		0	0	0	0	0	0	0	0	0	0	0	0	0	0
1660	<	fish density	<	1680		0	0	0	0	0	0	0	0	0	0	0	0	0	0
1680	<	fish density	<	1700		0	0	0	0	0	0	0	0	0	0	0	0	0	0
1700	<	fish density	<	1720		0	0	0	0	0	0	0	0	0	0	0	0	0	0
1720	<	fish density	<	1740		0	0	0	0	0	0	0	0	0	0	0	0	0	0
1740	<	fish density	<	1760		0	0	0	0	0	0	0	0	0	0	0	0	0	0
1760	<	fish density	<	1780		0	0	0	0	0	0	0	0	0	0	0	0	0	0
1780	<	fish density	<	1800		0	0	0	0	0	0	0	0	0	0	0	0	0	0
1800	<	fish density	<	1820		0	0	0	0	0	0	0	0	0	0	0	0	0	0
1820	<	fish density	<	1840		0	0	0	0	0	0	0	0	0	0	0	0	0	0
1840	<	fish density	<	1860		0	0	0	0	0	0	0	0	0	0	0	0	0	0
1860	<	fish density	<	1880		0	0	0	0	0	0	0	0	0	0	0	0	0	0
1880	<	fish density	<	1900		0	0	0	0	0	0	0	0	0	0	0	0	0	0
1900	<	fish density	<	1920		0	0	0	0	0	0	0	0	0	0	0	0	0	0
1920	<	fish density	<	1940		0	0	0	0	0	0	0	0	0	0	0	0	0	0
1940	<	fish density	<	1960		0	0	0	0	0	0	0	0	0	0	0	0	0	0
1960	<	fish density	<	1980		0	0	0	0	0	0	0	0	0	0	0	0	0	0
1980	<	fish density	<	2000		0	0	0	0	0	0	0	0	0	0	0	0	0	0
2000	<	fish density	<	2020		0	0	0	0	0	0	0	0	0	0	0	0	0	0
2020	<	fish density	<	2040		0	0	0	0	0	0	0	0	0	0	0	0	0	0
2040	<	fish density	<	2060		0	0	0	0	0	0	0	0	0	0	0	0	0	0
2060	<	fish density	<	2080		0	0	0	0	0	0	0	0	0	0	0	0	0	0
2080	<	fish density	<	2100		0	0	0	0	0	0	0	0	0	0	0	0	0	0
2100	<	fish density	<	2120		0	0	0	0	0	0	0	0	0	0	0	0	0	0
2120	<	fish density	<	2140		0	0	0	0	0	0	0	0	0	0	0	0	0	0
2140	<	fish density	<	2160		0	0	0	0	0	0	0	0	0	0	0	0	0	0
2160	<	fish density	<	2180		0	0	0	0	0	0	0	0	0	0	0	0	0	0
2180	<	fish density	<	2200		0	0	0	0	0	0	0	0	0	0	0	0	0	0
2200	<	fish density	<	2220		0	0	0	0	0	0	0	0	0	0	0	0	0	0
2220	<	fish density	<	2240		0	0	0	0	0	0	0	0	0	0	0	0	0	0
2240	<	fish density	<	2260		0	0	0	0	0	0	0	0	0	0	0	0	0	0
2260	<	fish density	<	2280		0	0	0	0	0	0	0	0	0	0	0	0	0	0
2280	<	fish density	<	2300		0	0	0	0	0	0	0	0	0	0	0	0	0	0
2300	<	fish density	<	2320		0	0	0	0	0	0	0	0	0	0	0	0	0	0
2320	<	fish density	<	2340		0	0	0	0	0	0	0	0	0	0	0	0	0	0
2340	<	fish density	<	2360		0	0	0	0	0	0	0	0	0	0	0	0	0	0
2360	<	fish density	<	2380		0	0	0	0	0	0	0	0	0	0	0	0	0	0
2380	<	fish density	<	2400		0	0	0	0	0	0	0	0	0	0	0	0	0	0
2400	<	fish density	<	2420		0	0	0	0	0	0	0	0	0	0	0	0	0	0
2420	<	fish density	<	2440		0	0	0	0	0	0	0	0	0	0	0	0	0	0
2440	<	fish density	<	2460		0	0	0	0	0	0	0	0	0	0	0	0	0	0
2460	<	fish density	<	2480		0	0	0	0	0	0	0	0	0	0	0	0	0	0
2480	<	fish density	<	2500		0	0	0	0	0	0	0	0	0	0	0	0	0	0
2500	<	fish density	<	2520		0	0	0	0	1	0	0	0	0	0	0	0	0	0
2520	<	fish density	<	2540		0	0	0	0	0	0	0	0	0	0	0	0	0	0
2540	<	fish density	<	2560		0	0	0	0	0	0	0	0	0	0	0	0	0	0
2560	<	fish density	<	2580		0	0	0	0	0	0	0	0	0	0	0	0	0	0
2580	<	fish density	<	2600		0	0	0	0	0	0	0	0	0	0	0	0	0	0
2600	<	fish density	<	2620		0	0	0	0	0	0	0	0	0	0	0	0	0	0
2620	<	fish density	<	2640		0	0	0	0	0	0	0	0	0	0	0	0	0	0
2640	<	fish density	<	2660		0	0	0	0	0	0	0	0	0	0	0	0	0	0
