# Supplementary material for: Spawning aggregations of checkered snapper (Lutjanus decussatus) and blackspot snapper (L. fulviflamma): seasonality, lunar-phase periodicity and spatial distribution within spawning ground
Source: PeerJ. 2023 Sep 11;11:e15991. doi: 10.7717/peerj.15991 (PMC10710171; doi:10.7717/peerj.15991)
Supplement: Supplemental Information 17 [file peerj-11-15991-s017.xls]

## Sheet: Sheet1
Figure 10A			Figure 10B			Figure 10C			Figure 10D
Size range (mm)	Size: Male		Size range (mm)	Size: Female		Age (years)	Age: Male		Age (years)	Age: Female
170-179	0		170-179	0		1	0		1	0
180-189	1		180-189	0		2	4		2	0
190-199	1		190-199	1		3	4		3	6
200-209	3		200-209	2		4	7		4	4
210-219	5		210-219	2		5	4		5	7
220-219	9		220-219	6		6	3		6	2
230-239	12		230-239	4		7	10		7	2
240-249	14		240-249	7		8	4		8	5
250-259	3		250-259	5		9	5		9	2
260-269	2		260-269	8		10	5		10	2
270-279	1		270-279	4		11	2		11	1
280-289	0		280-289	1		12	1		12	1
290-299	0		290-299	1		13	0		13	1
300-309	0		300-309	0		14	1		14	2
						15	1		15	2
						16	0		16	2
						17	0		17	2
						18	0		18	0
						19	0		19	0
						20	0		20	0
						21	0		21	0
