# Supplementary material for: Spawning aggregations of checkered snapper (Lutjanus decussatus) and blackspot snapper (L. fulviflamma): seasonality, lunar-phase periodicity and spatial distribution within spawning ground
Source: PeerJ. 2023 Sep 11;11:e15991. doi: 10.7717/peerj.15991 (PMC10710171; doi:10.7717/peerj.15991)
Supplement: Supplemental Information 18 [file peerj-11-15991-s018.xls]

## Sheet: Sheet1
1-minute sub-transect	Fish density (per 20 m x 5 m) for each section
	L. decussatus	L. fulviflamma	L. decussatus	L. fulviflamma	L. decussatus	L. fulviflamma	L. decussatus	L. fulviflamma	L. decussatus	L. fulviflamma	L. decussatus	L. fulviflamma	L. decussatus	L. fulviflamma	L. decussatus	L. fulviflamma	L. decussatus	L. fulviflamma	L. decussatus	L. fulviflamma	L. decussatus	L. fulviflamma	L. decussatus	L. fulviflamma	L. decussatus	L. fulviflamma	L. decussatus	L. fulviflamma
Section	April 4	April 4	April 11	April 11	May 3	May 3	May 13	May 13	June 1	June 1	June 10	June 10	July 1	July 1	July 10	July 10	July 31	July 31	August 9	August 9	August 29	August 29	September 7	September 7	October 2	October 2	October 7	October 7
1	0	0	0	0	0	0	0	0	4.61538	0	0.909091	0	1	0	8.18182	0	80	0	15.2	0	34.2857	0	1.17647	0	3.33333	0	0.869565	0
2	0	0	0	0	1.11111	0	0	0	105.217	0	13.0435	0	14.5455	0	40	0	60	0	41.5385	0	79	0	8.23529	0	19.0909	0	0	0
3	3.2	24	0	0	2.22222	0	0.740741	0	200	2	22.8571	2.85714	12.1739	0	35.7895	1.05263	39.1667	8.33333	40	10.5263	46.3158	8.42105	2.5	0	44.3478	0	0.909091	0
4	0.714286	0	0	0	20	0	0	0	25	135	16.6667	22.2222	32	0	24.7059	17.6471	22.7273	4.54545	18.2609	59.1304	6.31579	24.2105	11.25	30	17.3913	13.913	0.740741	14.8148
5	4.82759	0	0	0	21.0526	0	0	0	76.1905	47.619	34	8	45	0	4.44444	8.88889	61.8182	0	44.3478	4.34783	70.5263	0	0	25	39.1667	0	0	0
6	0.8	0	0	0	20	0	0	7.69231	94.1176	0	41.7391	0.869565	2.72727	0	50	7	6.36364	0	23.4783	0.869565	51.7647	0	5.88235	0	40	1.05263	0.408163	0.816327
7	0	15.3846	0	0	93.3333	0	0	0	77.7778	0	41.9048	1.90476	7.61905	0	45.7143	6.66667	24	0	46.6667	0	57	0	4.70588	0	41.8182	0.909091	0	0
8	2.4	0	0	0	3.75	0	0	1.42857	125	0	38.0952	0.952381	15.7895	0	30.4762	0	46.087	0	46.087	0	67.2727	0	11.7647	0	30.4	0	1.66667	0
9	0	0	0	0	9.41176	0	0.833333	0	100	0	40	40	21.0526	0	50.5263	1.05263	14.6667	9.33333	12.1739	78.2609	12.1739	2.6087	1.17647	0	10.8333	5.83333	0	9.16667
10	1.90476	0	0	0	20	0	0	0	18.8235	0	11.5789	170.526	16.4706	0	7.61905	142.857	20.9524	0.952381	14.1667	39.1667	12.6316	0	4	0	38	6	0	0.769231
11	6.66667	0	0	0	22.5	0	0	0	6.66667	266.667	28.5714	95.2381	20	0	26	52	2.72727	0	17.6	64	7	0	0	43.3333	40	5	0	1.66667
12	2.30769	0	0	0	13.3333	0	0	333.333	73.3333	16	23.0769	3.07692	16.1905	0	14.5455	83.6364	10.8333	0	18.2609	0	15.7895	0	0	0	14.7826	0	0	0
13	0	222.222	0	0	0	0	0	304.348	26.6667	66.6667	22.8571	0	24.4444	0	8.88889	0	10	0	16.5217	0	12	0	0.869565	0	20	0	0	0
14	0	560	0	0	76.3636	0	0	64.2857	77.6471	0	20	0	11.5789	0	8.18182	0	8.69565	0	3.47826	0	16.3636	0	1.25	21.25	5.21739	0	0	0
15	2.5	0	1.05263	0	16	0	0.714286	0	25.8824	0	2.85714	0	48.2353	11.7647	13.3333	0	7.27273	0	7.85714	71.4286	10.4348	0	6.66667	13.3333	16.3636	4.54545	0	36.5217
16	2.6087	43.4783	0	0	31.4286	0	0	230.769	29.0909	0	20	242.857	8.57143	14.2857	10.9091	6.36364	11.8182	15.4545	0.869565	434.783	4.21053	14.7368	1.11111	0	1.66667	60.8333	0	71.6667
17	8.33333	25.8333	0	0	27.5	0	0	120	21.4286	0	8.75	100	18.9474	84.2105	0	285.714	7	19	0	444.444	15.2941	37.6471	0	0	5.83333	54.1667	0	23.8462
18	0	240	0	0	62.5	0	0	53.8462	31.4286	0	0	610.526	4.70588	141.176	2	250	11.8182	40	0	320	0	55.5556	1.42857	0	7.69231	19.2308	0	21.5385
19	0	81.8182	0	0	75.5556	0	0	0	50.6667	0	17.6471	82.3529	0	187.5	2.6087	217.391	0	3.33333	21.8182	118.182	64.7619	1.90476	1.17647	2.35294	33.3333	68.5714	0	36.5217
20	2.5	0	0.952381	0.952381	122.857	0	0	0	44.2857	4.28571	62.1053	0	10.6667	333.333	1.73913	391.304	46.087	51.3043	11.8519	185.185	46	10	2.10526	8.42105	8.88889	43.3333	0	75
21	3.33333	0	0	0	0	1466.67	0	0	33.8462	30.7692	38.0952	9.52381	0	500	67.2727	63.6364	95	1.66667	6.4	240	91.5789	8.42105	1.05263	78.9474	1.37931	172.414	0	53.913
22	2.72727	0	0	0	1.73913	434.783	0.769231	0	18.8889	111.111	16.8421	63.1579	33.3333	55.5556	2.5	208.333	49.0909	9.09091	0.740741	444.444	27	26	0	141.176	0	137.931	0	0.952381
23	2.6087	0	0	0	13.3333	1111.11	0	0	0	875	6.95652	347.826	42.8571	91.4286	0.833333	250	8.69565	10.4348	0	244.8	2	81	0	133.333	18	1	0	0
24	0	0	0	0	73.6842	0			12.5	1250	0	545.455	72.9412	51.7647	0	576.923	27.2727	0	24	8	26.6667	0.952381	1.17647	75.2941	17.1429	0	0	0
25	0.833333	0	0	0	61.9048	0			6.66667	1111.11	13.3333	180.952	61.1111	10	5	40	60	0	17.3913	0	29.5652	0	1.11111	66.6667	16.6667	0	0	0
26			0	0	76.1905	0			29.4118	588.235	31.1111	0	25	37.5	10.7692	0	52	0	21.5385	0	24.7619	0	1.17647	23.5294	4.44444	0
27			1.05263	1.05263	42	400			24	533.333	40.9091	0	16.25	75	13.6364	0	32.8	0	5	0	30.4762	0	3.15789	22.1053	0	0
28			4.28571	4.28571	19.1304	260.87			138.667	93.3333	31	0	6.25	125	1.66667	0	19.0909	0	0	0	38.8889	0	0	55.5556
29			0	0	0	700			28.2353	117.647	4.54545	0	2.35294	235.294			0	0			1.81818	0	1.05263	21.0526
30			0	0	55.5556	44.4444			25	2500	3.07692	0	9.41176	70.5882							0	0	4.70588	1.17647
31			0	0	57.1429	0			31.1111	24.4444			108.235	0									4.70588	0
32			0	0	80	0			31.5789	0			28.5714	0									4.70588	0
33			0	0	34.4444	0			37.3333	0			200	0									2	0
34					7.36842	0			75	0			40	0									1.17647	0
35					1.05263	0			58.8235	0			8.88889	0
36					1.81818	0			38.75	0			0	0
37									7.82609	0			0	0
38									0	0			0	0
39													0	0
40													0	0
