# Supplementary material for: Spawning aggregations of checkered snapper (Lutjanus decussatus) and blackspot snapper (L. fulviflamma): seasonality, lunar-phase periodicity and spatial distribution within spawning ground
Source: PeerJ. 2023 Sep 11;11:e15991. doi: 10.7717/peerj.15991 (PMC10710171; doi:10.7717/peerj.15991)
Supplement: Supplemental Information 19 [file peerj-11-15991-s019.xls]

## Sheet: Inside aggregation ste
		Fish density per 600 m x 5 m transect
Year	Date	L. decussatus	L. fulviflamma
2020	November 8	10	3
2020	November 15	8	4
2020	December 8	6	5
2020	December 15	3	3
2021	January 5	3	6
2021	January 13	9	1
2021	February 5	7	0
2021	Feburuary 13	7	1
2021	March 5	2	0
2021	March 13	5	16
2021	April 4	58	1521
2021	April 11	6	14
2021	May 3	903	4040
2021	May 13	4	1372
2021	May 22	4	227
2021	May 26	8	324
2021	June 1	1565	6337
2021	June 10	663	2499
2021	June 17	3	252
2021	June 25	6	2
2021	July 1	877	1637
2021	July 10	502	3000
2021	July 17	5	498
2021	July 31	939	189
2021	Ausgut 9	554	3495
2021	August 16	1	346
2021	August 24	4	5
2021	August 29	901	258
2021	September 7	78	660
2021	Setember 16	2	422
2021	September 21	2	27
2021	October 2	529	765
2021	October 7	6	418
2021	October 15	3	43
2021	October 20	4	7
2021	October 29	6	4
2021	November 5	6	5

## Sheet: Outside aggregation site
	Number of fish count		Distance during 20-minute observation		Fish density per 600m x 5 m
Stusy sites outside aggregation site	L. decussatus	L. fulviflamma			L. decussatus	L. fulviflamma
KP1	1	0	335		1.79104	0
KP11	2	0	373		3.21716	0
KP13	1	0	343		1.74927	0
KP14	3	0	334		5.38922	0
KP15	0	0	355		0	0
KP16	1	0	390		1.53846	0
KP17	4	0	278		8.63309	0
KP18	6	0	318		11.3208	0
KP20	2	0	421		2.85036	0
KP21	2	0	356		3.37079	0
KP22	1	0	373		1.60858	0
KP26	1	0	348		1.72414	0
KP27	1	0	406		1.47783	0
KP28	0	0	334		0	0
KP29	1	0	399		1.50376	0
KP30	1	0	370		1.62162	0
KP31	1	0	318		1.88679	0
KP32	2	0	326		3.68098	0
KP33	0	0	345		0	0
KP34	3	0	312		5.76923	0
KP35	1	0	258		2.32558	0
KP36	2	0	377		3.18302	0
KP37	0	0	392		0	0
KP38	0	0	300		0	0
KP39	4	0	345		6.95652	0
KP40	1	0	321		1.86916	0
KP41	3	0	352		5.11364	0
KP42	4	0	315		7.61905	0
KP43	0	0	291		0	0
KP44	6	0	269		13.3829	0
KP45	3	0	217		8.29493	0
KP5	2	0	340		3.52941	0
KP50	0	0	287		0	0
KP51	0	0	310		0	0
KP52	1	0	340		1.76471	0
KP53	6	0	379		9.49868	0
KP54	1	0	428		1.40187	0
KP55	7	0	333		12.6126	0
KP56	1	0	367		1.63488	0
KP57	3	0	339		5.30973	0
KP58	5	0	385		7.79221	0
KP59	1	0	274		2.18978	0
KP60	5	0	327		9.17431	0
KP61	0	0	339		0	0
KP63	3	0	337		5.34125	0
KP64	2	1	391		3.06905	1.53453
KP65	3	0	354		5.08475	0
KP68 (KP39K)	0	0	279		0	0
KP69 (KP40K)	0	0	245		0	0
KP7	0	0	266		0	0
KP70 (KP41K)	2	0	373		3.21716	0
KP9	2	0	370		3.24324	0
P1	2	0	311		3.85852	0
P10	4	0	233		10.3004	0
P11	3	0	310		5.80645	0
P12	1	0	315		1.90476	0
P13	0	0	364		0	0
P2	4	0	310		7.74194	0
P3	0	0	326		0	0
P4	2	0	257		4.66926	0
P5	1	0	328		1.82927	0
P7	0	0	336		0	0
P8	0	0	328		0	0
P9	3	0	341		5.27859	0
P6	4	0	306		7.84314	0
				Average	3.56883	0.0236081
